# Supplementary material
Source: PubMed Central journal article supplement (PMC3425359)

Supplementary Table 1. Interaction Energy Values Calculated on a per residue basis for peptide-cyclin complexes

|       | <b>Cyclin A</b> |   | <b>Cyclin A</b> |   | <b>Cyclin A</b> |   | <b>Cyclin A</b> |     | <b>Cyclin A</b> |         |
|-------|-----------------|---|-----------------|---|-----------------|---|-----------------|-----|-----------------|---------|
| H     | -65.1           | S | -63.9           | P | -23.1           |   |                 |     |                 |         |
| A     | -18.0           | A | -19.2           | V | -15.8           |   |                 |     |                 |         |
| K     | -42.2           | K | -40.6           | K | -47.4           |   |                 |     |                 |         |
| R     | -72.3           | R | -69.7           | R | -74.3           | R | -111.3          | Cit | -38.4           |         |
| R     | -58.7           | R | -25.2           | R | -9.3            | R | -46.4           | R   | -47.2           |         |
| L     | -11.7           | L | -12.8           | L | -9.9            | L | -13.8           | L   | -13.8           |         |
| I     | -6.8            | F | -12.2           | D | 0.6             | I | -0.1            | I   | -0.06           |         |
| F     | -23.5           | G | -4.2            | L | -15.4           | F | -19.5           | F   | -19.6           |         |
| total | -298.3          |   | -247.8          |   | -194.6          |   | -191.1          |     |                 | -119.06 |
|       | <b>Cyclin D</b> |   | <b>Cyclin D</b> |   | <b>Cyclin D</b> |   | <b>Cyclin D</b> |     | <b>Cyclin D</b> |         |
| H     | -20             | S | -24.1           | P | -18.8           |   |                 |     |                 |         |
| A     | -6.3            | A | -5.6            | V | -11.9           |   |                 |     |                 |         |
| K     | -44.6           | K | -44.7           | K | -52.2           |   |                 |     |                 |         |
| R     | -54.7           | R | -57             | R | -47.6           | R | -106.9          | Cit | -30.3           |         |
| R     | -27             | R | -17.6           | R | -11.1           | R | -19.2           | R   | -19.2           |         |
| L     | -15.2           | L | -13.7           | L | -14.7           | L | -14.1           | L   | -14.1           |         |
| I     | 0.7             | F | -10.2           | D | -1.6            | I | 0.2             | I   | 0.2             |         |
| F     | -13             | G | -4.7            | L | -11.7           | F | -13.9           | F   | -13.9           |         |
| TOTAL | -180.1          |   | -177.6          |   | -169.6          |   | -153.9          |     |                 | -77.3   |

Supplementary Table 2. Binding Energy and Desolvation penalty calculated on peptide-cyclin complexes

| <b>Cyclin A</b> | Complex<br>Desolvation<br>Penalty | <b>Cyclin D</b> | Complex<br>Desolvation<br>Penalty |
|-----------------|-----------------------------------|-----------------|-----------------------------------|
| SAKRRLFG        | 3.12                              | SAKRRLFG        | 3.23                              |
| HAKRRLIF        | 3.48                              | HAKRRLIF        | 3.42                              |
| PVKRRLDL        | 2.93                              | PVKRRLDL        | 3.08                              |
| RRLIF           | 2.36                              | RRLIF           | 2.47                              |
| CitRLIF         | 2.32                              | CitRLIF         | 2.44                              |

| <b>1OKV</b> | <b>CYCLIN A</b> | <b>2W96</b> | <b>CYCLIN D</b> |
|-------------|-----------------|-------------|-----------------|
| HAKRRLIF    | cyclin fixed    | HAKRRLIF    | BB FIXED        |
| MET210      | -4.7            | MET56       | -3.8            |
| ILE213      | -6.5            | ILE59       | -8.7            |
| LEU214      | -3.3            | VAL60       | -2.7            |
| ASP216      | -16.7           | THR62       | 0.6             |
| TRP217      | -8.8            | TRP63       | -6.2            |
| GLU220      | -28.9           | GLU66       | -47.4           |
| VAL221      | -1.6            | VAL67       | -1.1            |
| GLU224      | -41.2           | GLU70       | -18.8           |
| ARG250      | -9.1            | LYS96       | -0.9            |
| LEU253      | -1.4            | SER97       | -1.2            |
| GLN254      | -13             | LEU99       | -1.7            |
| TYR280      | -2              | GLN100      | -8.7            |
| ILE281      | -3              | ILE126      | -5.2            |
| THR282      | -4.9            | TYR127      | -8.3            |
| ASP283      | -36.1           | THR128      | -5.3            |
| THR285      | -2.3            | ASP129      | -50.3           |
| TOTAL       | -183.5          | SER131      | -6              |
|             |                 | total       | -90.2           |

Supplementary Table 2. Binding Energetic Data for P27/Cyclin complexes

| Residue | cyclin D 2w96                    | cyclin A 1JSU                    |
|---------|----------------------------------|----------------------------------|
|         | Interaction Energy<br>(kcal/mol) | Interaction Energy<br>(kcal/mol) |
| C_LYS25 | -41.2                            | -59.4                            |
| C_PRO26 | -5.4                             | -3.4                             |
| C_SER27 | 0.3                              | 3.6                              |
| C_ALA28 | -10.0                            | -15.0                            |
| C_CYS29 | -4.1                             | -7.0                             |
| C_ARG30 | -44.3                            | -54.7                            |
| C_ASN31 | -11.9                            | -3.0                             |
| C_LEU32 | -14.1                            | -14.6                            |
| C_PHE33 | -15.5                            | -15.0                            |
| C_GLY34 | 1.8                              | 0.7                              |
| C_PRO35 | -3.0                             | -2.7                             |
| C_VAL36 | -1.9                             | -3.6                             |
| C_ASP37 | -3.9                             | -3.3                             |
| C_HIS38 | -7.8                             | 10.8                             |
| C_GLU39 | -0.9                             | -4.7                             |
| C_GLU40 | -10.6                            | -4.1                             |
| C_LEU41 | -9.1                             | -3.2                             |
| C_THR42 | -1.4                             | -4.2                             |
| C_ARG43 | -2.8                             | 8.8                              |
| C_ASP44 | -34.7                            | -22.9                            |
| C_LEU45 | -9.8                             | -8.7                             |
| C_GLU46 | 0.5                              | 19.5                             |
| C_LYS47 | 0.6                              | 5.9                              |
| C_HIS48 | -1.2                             | -9.3                             |
| C_CYS49 | -4.0                             | -3.7                             |

| <b>Name</b> | <b>Forcefield</b> | <b>Total Interaction Energy (kcal/mol)</b> | <b>Total VDW Interaction Energy (kcal/mol)</b> | <b>Total Electrostatic Interaction Energy (kcal/mol)</b> |
|-------------|-------------------|--------------------------------------------|------------------------------------------------|----------------------------------------------------------|
| 2W96        | CHARMm            | -234.52912                                 | -89.36208                                      | -145.16704                                               |
| 1JSU        | CHARMm            | -193.08529                                 | -51.41365                                      | -141.67164                                               |

Supplementary Table 4. Analytical Data for Cyclin A2 and D1 Binding Peptides

| Peptide    | Purity | Column Dimensions | Method                            | FlowRate | Retention Time | Theoretical MW | Observed MW |
|------------|--------|-------------------|-----------------------------------|----------|----------------|----------------|-------------|
| CitRLIF    | >90%   | 4.6 × 250 nm      | 0-60% acetonitrile/water/0.1%TFA  | 1ml/min  | 21.8           | 704.43         | 704.5       |
| HAKCitRLIF | >90%   | 4.6 × 250 nm      | 5-65% acetonitrile/water/0.1%TFA  | 1ml/min  | 15.1           | 1041.28        | 1041.3      |
| HAKRRLIF   | >90%   | 4.6 × 250 nm      | 5-65% acetonitrile/water/0.1%TFA  | 1ml/min  | 14.8           | 1040.27        | 1040.3      |
| HAKRRLX1   | >90%   | 4.6 × 250 nm      | 0-60% acetonitrile/water/0.1%TFA  | 1ml/min  | 31.9           | 1029.24        | 1029.59     |
| HAKRRLX2   | >90%   | 4.6 × 250 nm      | 0-60% acetonitrile/water/0.1%TFA  | 1ml/min  | 21.2           | 1045.31        | 1045        |
| HAKRRLX3   | >90%   | 4.6 × 250 nm      | 0-60% acetonitrile/water/0.1%TFA  | 1ml/min  |                | 1045.31        | 1045        |
| HAKRRLX4   | >90%   | 4.6 × 250 nm      | 5-65% acetonitrile/water/0.1%TFA  | 1ml/min  | 15.2           | 1018.28        | 1018.2      |
| HAKRRLX5   | >90%   | 4.6 × 250 nm      | 5-65% acetonitrile/water/0.1%TFA  | 1ml/min  | 16.6           | 1032.31        | 1031.7      |
| HAKRRLX6   | >90%   | 4.6 × 250 nm      | 0-60% acetonitrile/water/0.1%TFA  | 1ml/min  | 23.3           | 1045.33        | 1045        |
| HAKRRLX7   | >90%   | 4.6 × 250 nm      | 0-60% acetonitrile/water/0.1%TFA  | 1ml/min  | 17.4           | 1040.27        | 1040.64     |
| HAKTRLIF   | >90%   | 4.6 × 250 nm      | 5-65% acetonitrile/water/0.1%TFA  | 1ml/min  | 15.8           | 985.19         | 984.6       |
| PAKRRLFG   | >90%   | 4.6 × 250 nm      | 5-65% acetonitrile/water/0.1%TFA  | 1ml/min  | 14.1           | 944.14         | 943.65      |
| PVKRRL3CFG | >90%   | 4.6 × 250 nm      | 5-65% acetonitrile/water/0.1%TFA  | 1ml/min  | 15.2           | 1006.7         | 1005.7      |
| PVKRRLFG   | >90%   | 4.6 × 250 nm      | 5-65% acetonitrile/water/0.1%TFA  | 1ml/min  | 13.8           | 972.19         | 971.6       |
| RRLlpf     | >90%   | 4.6 × 250 nm      | 0-60% acetonitrile/water/0.1%TFA  | 1ml/min  | 21.8           | 704.86         | 704.437     |
| SAKRALFGM  | >90%   | 4.6 × 250 nm      | 5-65% acetonitrile/water/0.1%TFA  | 1ml/min  | 16.5           | 980.19         | 980.1       |
| SAKRNLFG   | >90%   | 4.6 × 250 nm      | 5-65% acetonitrile/water/0.1%TFA  | 1ml/min  | 13.9           | 891.03         | 890.5       |
| SAKRNLFGM  | >90%   | 4.6 × 250 nm      | 5-65% acetonitrile/water/0.1%TFA  | 1ml/min  | 16.0           | 1023.22        | 1023.2      |
| SAKRRLPBA  | >90%   | 4.6 × 250 nm      | 0-100% acetonitrile/water/0.1%TFA | 1ml/min  | 28.8           | 911.1          | 908.6       |
| SAKRRLX1G  | >90%   | 4.6 × 250 nm      | 12-42% acetonitrile/water/0.1%TFA | 1ml/min  | 10.1           | 922.9          | 923.4       |
| SAKRRLX2G  | >90%   | 4.6 × 250 nm      | 13-43% acetonitrile/water/0.1%TFA | 1ml/min  | 10.3           | 938.9          | 939.7       |
| SAKRRLX3G  | >90%   | 4.6 × 250 nm      | 5-65% acetonitrile/water/0.1%TFA  | 1ml/min  | 13.3           | 939.16         | 939         |
| SAKRRLX4G  | >90%   | 4.6 × 250 nm      | 5-65% acetonitrile/water/0.1%TFA  | 1ml/min  | 13.7           | 911.12         | 910.6       |
| SAKRRLX5G  | >90%   | 4.6 × 250 nm      | 5-65% acetonitrile/water/0.1%TFA  | 1ml/min  | 14.3           | 925.15         | 924.8       |
| SAKRRLX6G  | >90%   | 4.6 × 250 nm      | 17-47% acetonitrile/water/0.1%TFA | 1ml/min  | 11.2           | 939.9          | 940.8       |
| SAKRRLX7G  | >90%   | 4.6 × 250 nm      | 6-36% acetonitrile/water/0.1%TFA  | 1ml/min  | 11.1           | 934.9          | 935.8       |
| SAKRRLX8G  | >90%   | 4.6 × 250 nm      | 10-35% acetonitrile/water/0.1%TFA | 1ml/min  | 9.7            | 934.06         | 935.55      |
| SCCP10     | >90%   | 4.6 × 250 nm      | 0-60% acetonitrile/water/0.1%TFA  | 1ml/min  | 32.2           | 721.27         | 721.2       |
| SCCP5624   | >90%   | 4.6 × 250 nm      | 0-60% acetonitrile/water/0.1%TFA  | 1ml/min  | 26.5           | 638.8          | 639         |

Supplementary Figure 1 (Correlation between IC50 and interaction energy for cyclin A -peptide complexes

| Cyclin A | Interaction Energy (Kcal/Mol) | IC50 ( $\mu\text{M}$ ) | LogIC50 |
|----------|-------------------------------|------------------------|---------|
| HAKRRLIF | -298.3                        | 0.021                  | -1.68   |
| SAKRRLFG | -247.8                        | 0.073                  | -1.14   |
| PVKRRLDL | -194.6                        | 1.2                    | 0.08    |
| RRLIF    | -191.1                        | 7.7                    | 0.89    |

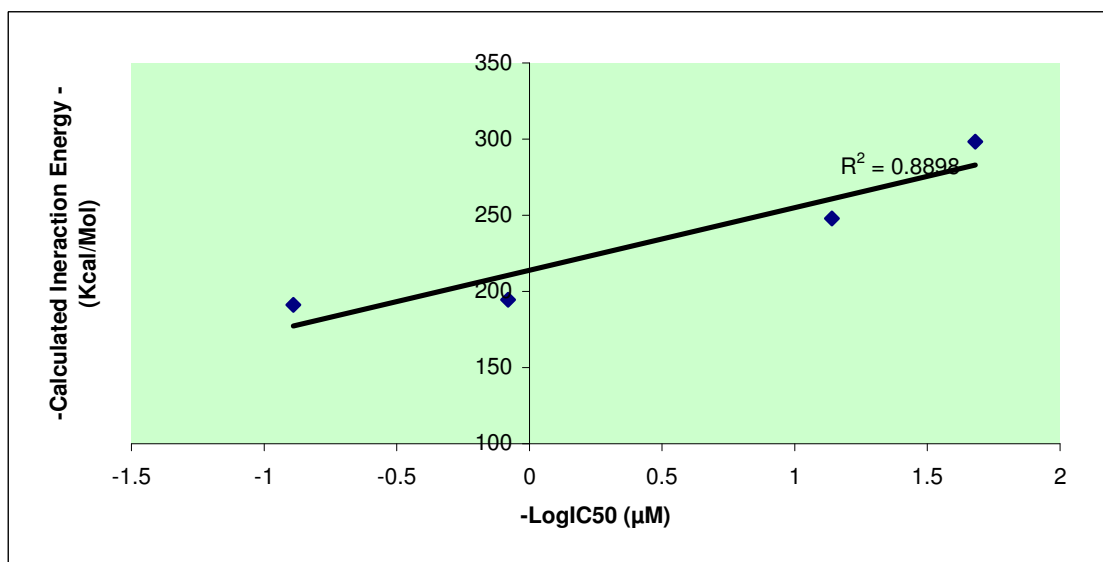

Supplement: NIHMS393349-supplement-001.pdf [file NIHMS393349-supplement-001.pdf]
